# Supplementary material for: Efficient microwave traps with markedly enhanced interfacial polarization and impedance matching enabled by dual-shelled, dual-cavity magnetic@dielectric hollow nanospheres
Source: Royal Society of Chemistry journal article supplement (doi:10.1039/d0tc03533e), 2020-01-01
Supplement: d0tc03533e1.pdf [file d0tc03533e1.pdf]

# **Efficient Microwave Traps with Markedly Enhanced Interfacial Polarization and Impedance Matching Enabled by Dual-Shelled, Dual-Cavity Magnetic@Dielectric Hollow Nanospheres**

*Jiasong Hua, Wenjun Ma, Xiaoyun Liu, Qixin Zhuang,\* Zeyang Wu, Huang Huang, and Shaoliang Lin\**

J. Hua, W. Ma, Prof. X. Liu, Prof. Q. Zhuang, Z Wu, H. Huang, Prof. S. Lin  
The Key Laboratory of Advanced Polymer Materials of Shanghai, School of Materials Science and Engineering, East China University of Science and Technology, Shanghai 200237, China  
E-mail: [qxzhuang@ecust.edu.cn](mailto:qxzhuang@ecust.edu.cn) (Q.Z.) and [slin@ecust.edu.cn](mailto:slin@ecust.edu.cn) (S.L.)

## Figures and Figure Captions

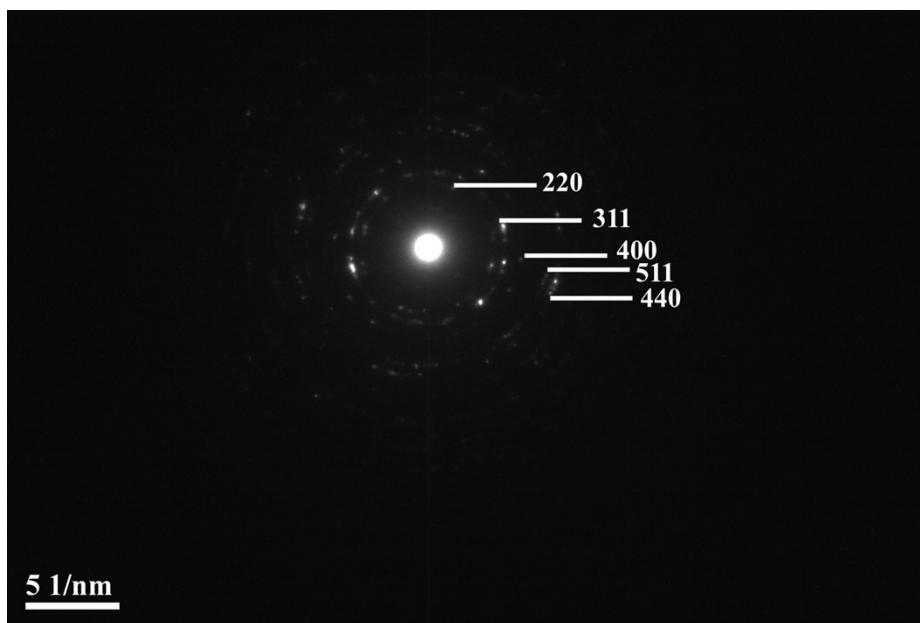

**Figure S1.** Selected-area electron diffraction (SAED) pattern of  $\text{Fe}_3\text{O}_4$  hollow spheres (i.e.,  $\text{Fe}_3\text{O}_4$ -HNs).

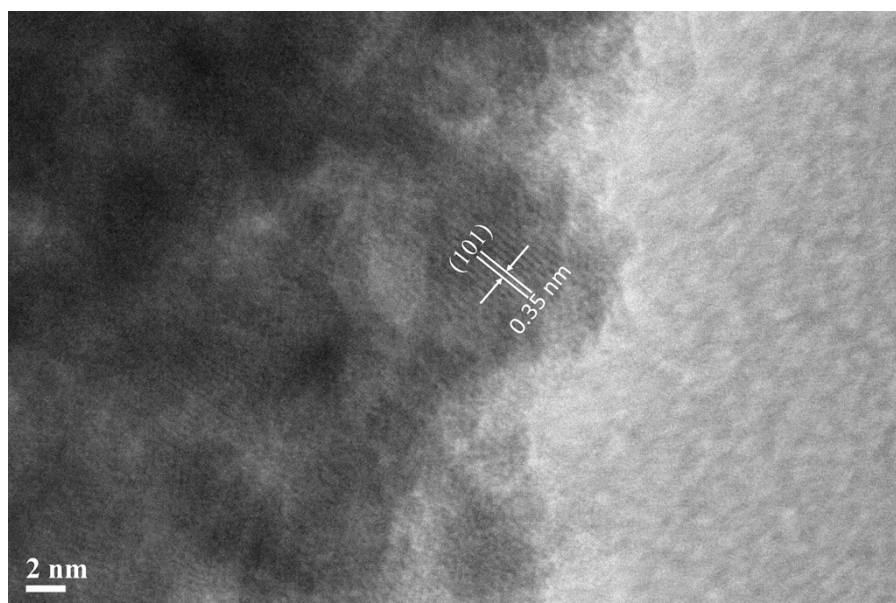

**Figure S2.** HRTEM image of the outer  $\text{TiO}_2$  shell on a single dual-shelled  $\text{Fe}_3\text{O}_4@ \text{TiO}_2$  hollow nanosphere (i.e., DS- $\text{Fe}_3\text{O}_4@ \text{TiO}_2$ -HN).

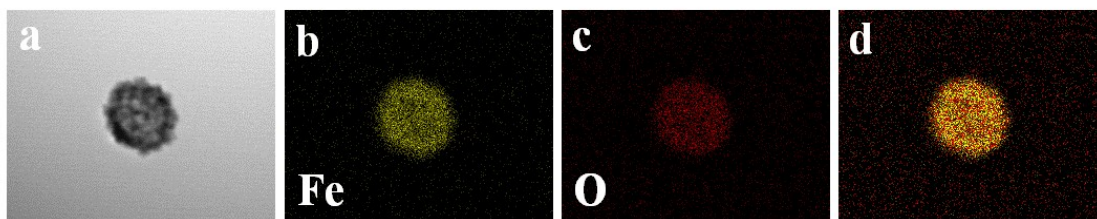

**Figure S3.** (a) TEM and (b-d) energy-dispersive X-ray spectroscopy (EDX) elemental mappings of a single  $\text{Fe}_3\text{O}_4$  hollow sphere (i.e.,  $\text{Fe}_3\text{O}_4\text{-HN}$ ): (b) Fe, (c) O, and (d) combined.

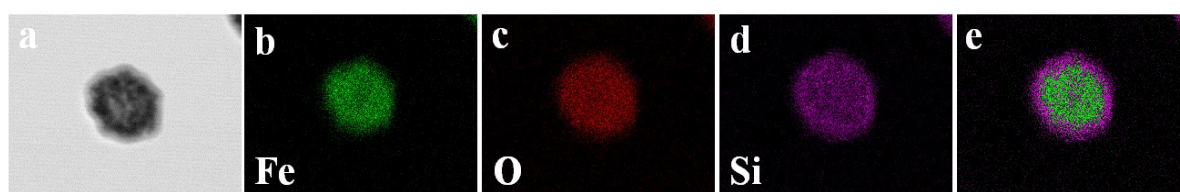

**Figure S4.** (a) TEM and (b) EDX elemental mapping of a single  $\text{Fe}_3\text{O}_4@\text{SiO}_2$  hollow nanosphere (i.e.,  $\text{Fe}_3\text{O}_4@\text{SiO}_2\text{-HN}$ ): (b) Fe, (c) O, (d) Si, and (e) combined.

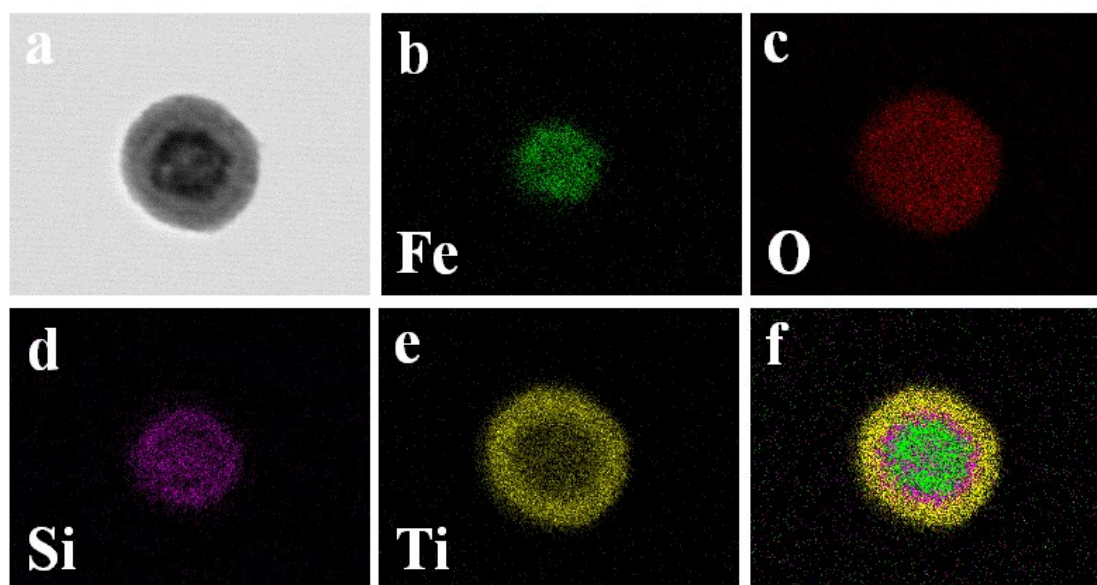

**Figure S5.** (a) TEM and (b) EDX elemental mapping of a single  $\text{Fe}_3\text{O}_4@\text{SiO}_2@\text{TiO}_2$  hollow nanosphere (i.e.,  $\text{Fe}_3\text{O}_4@\text{SiO}_2@\text{TiO}_2\text{-HN}$ ): (b) Fe, (c) O, (d) Si, (e) Ti, and (f) combined.

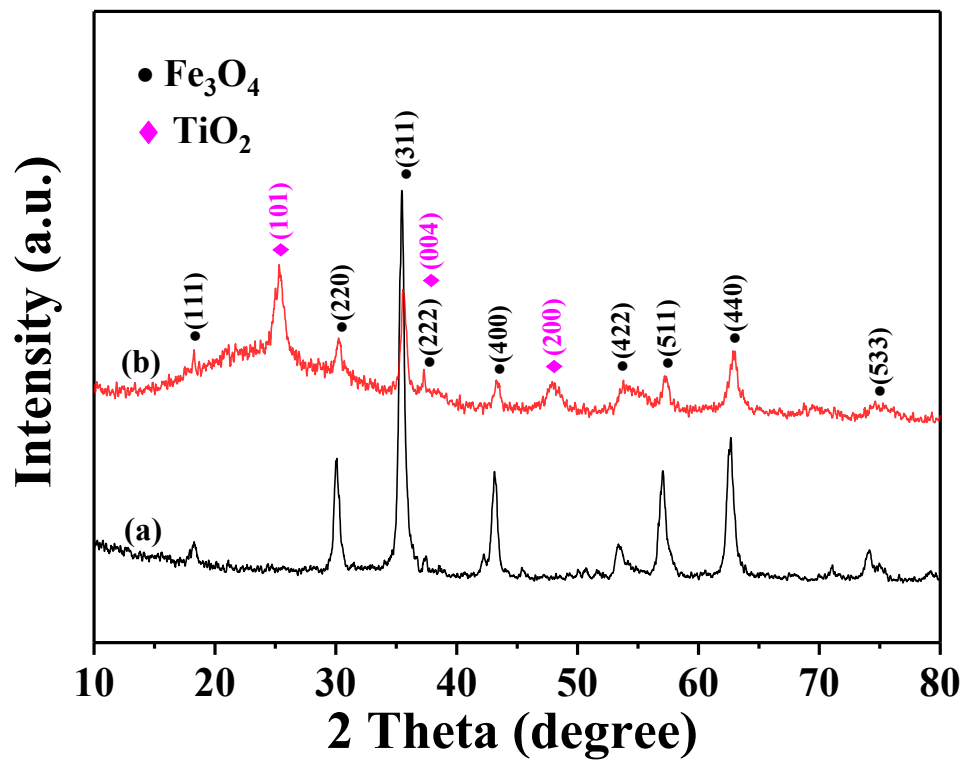

**Figure S6.** XRD patterns of (a) Fe<sub>3</sub>O<sub>4</sub> hollow spheres (i.e., Fe<sub>3</sub>O<sub>4</sub>-HNs) and (b) dual-shelled Fe<sub>3</sub>O<sub>4</sub>@TiO<sub>2</sub> hollow nanospheres (i.e., DS-Fe<sub>3</sub>O<sub>4</sub>@TiO<sub>2</sub>-HNs).

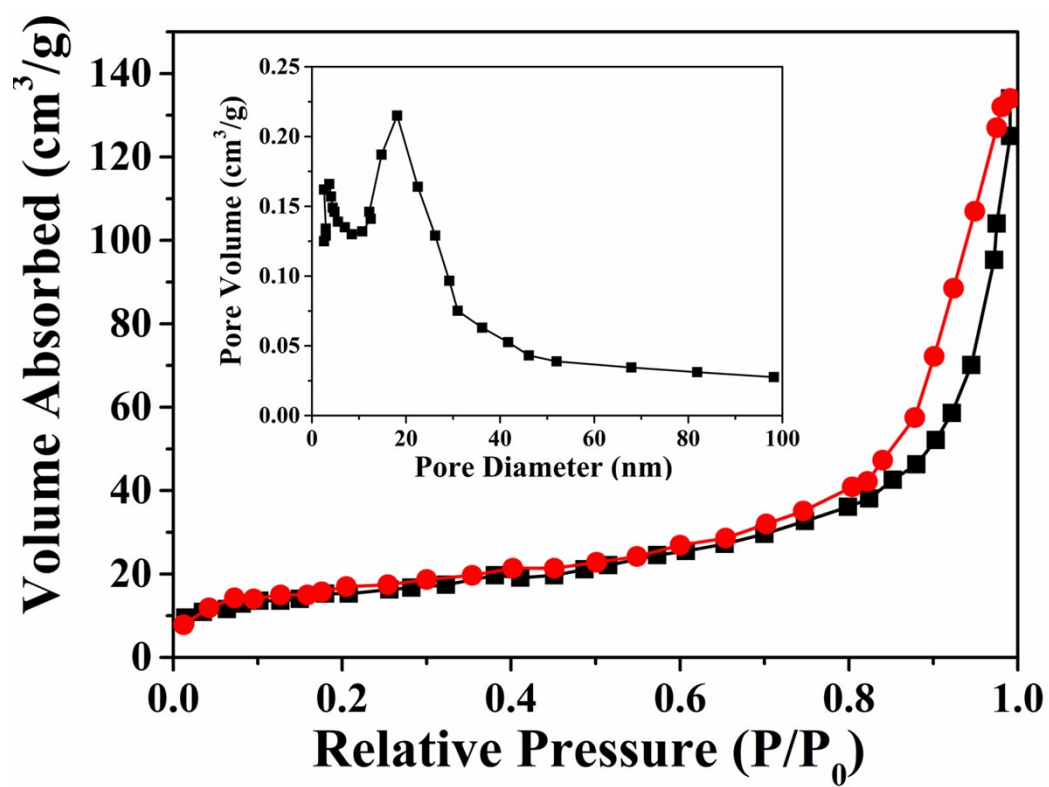

**Figure S7.** Nitrogen sorption isotherms and corresponding pore size distribution curve (inset) of DS-Fe<sub>3</sub>O<sub>4</sub>@TiO<sub>2</sub>-HNs.

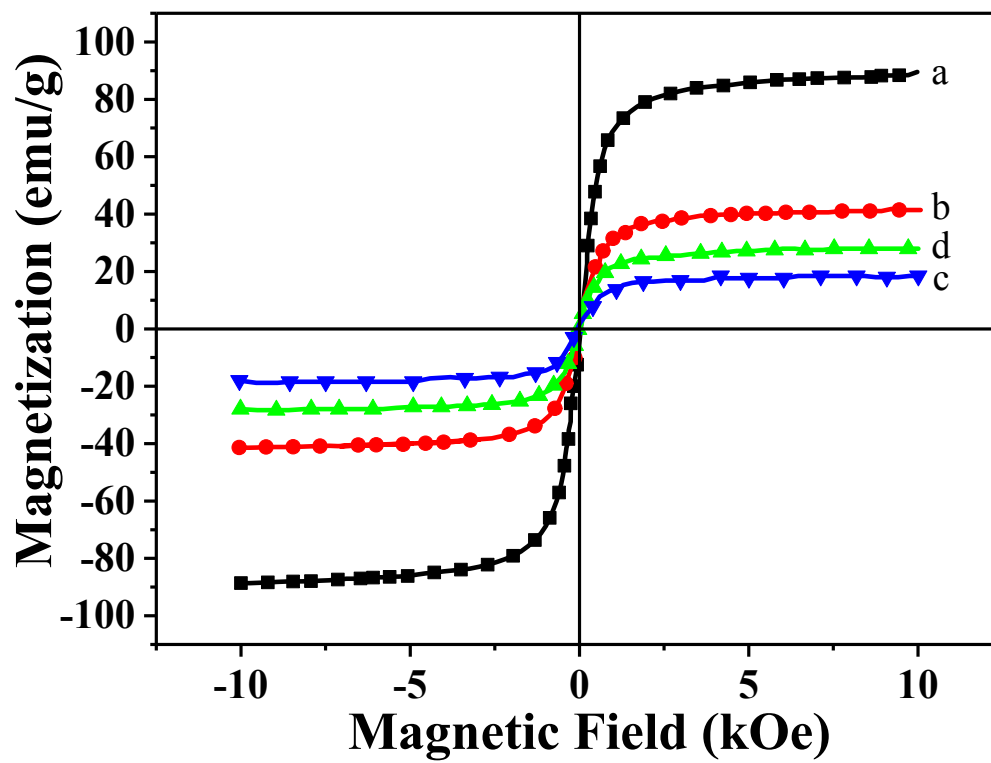

**Figure S8.** Hysteresis loops of (a)  $\text{Fe}_3\text{O}_4$ -HNs, (b)  $\text{Fe}_3\text{O}_4@SiO_2$ -HNs, (c)  $\text{Fe}_3\text{O}_4@SiO_2@TiO_2$ -HNs, and (d) DS- $\text{Fe}_3\text{O}_4@TiO_2$ -HNs.

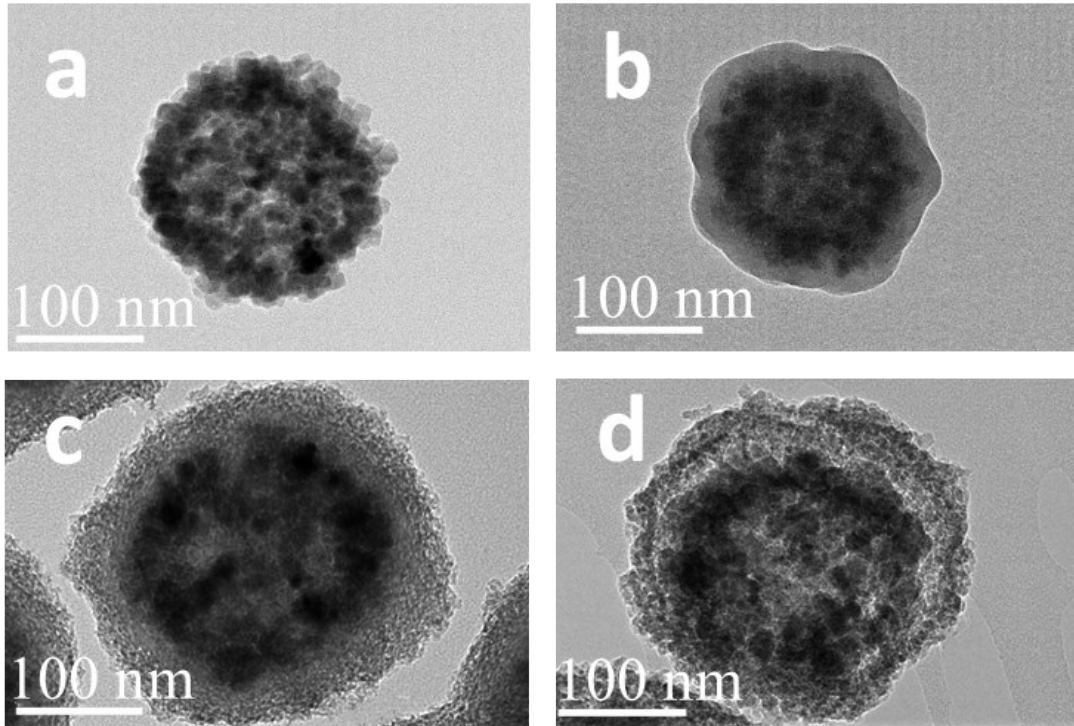

**Figure S9.** TEM images of (a)  $\text{Fe}_3\text{O}_4$ -HNs, (b)  $\text{Fe}_3\text{O}_4@$  $\text{SiO}_2$ -HNs-40-20, (c)  $\text{Fe}_3\text{O}_4@$  $\text{SiO}_2@$  $\text{TiO}_2$ -HNs-40-20-20, and (d) DS- $\text{Fe}_3\text{O}_4@$  $\text{TiO}_2$ -HNs-40-20-20.

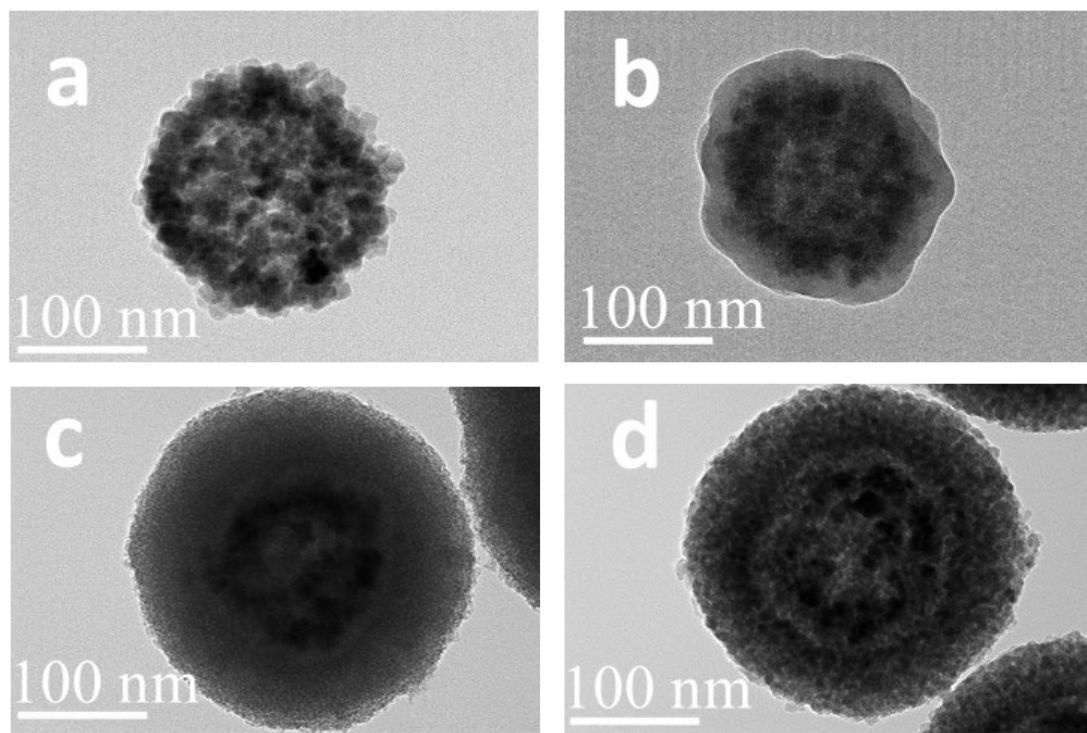

**Figure S10.** TEM images of (a)  $\text{Fe}_3\text{O}_4$ -HNs, (b)  $\text{Fe}_3\text{O}_4@$  $\text{SiO}_2$ -HNs-40-20, (c)  $\text{Fe}_3\text{O}_4@$  $\text{SiO}_2@$  $\text{TiO}_2$ -HNs-40-20-60, and (d) DS- $\text{Fe}_3\text{O}_4@$  $\text{TiO}_2$ -HNs-40-20-60.



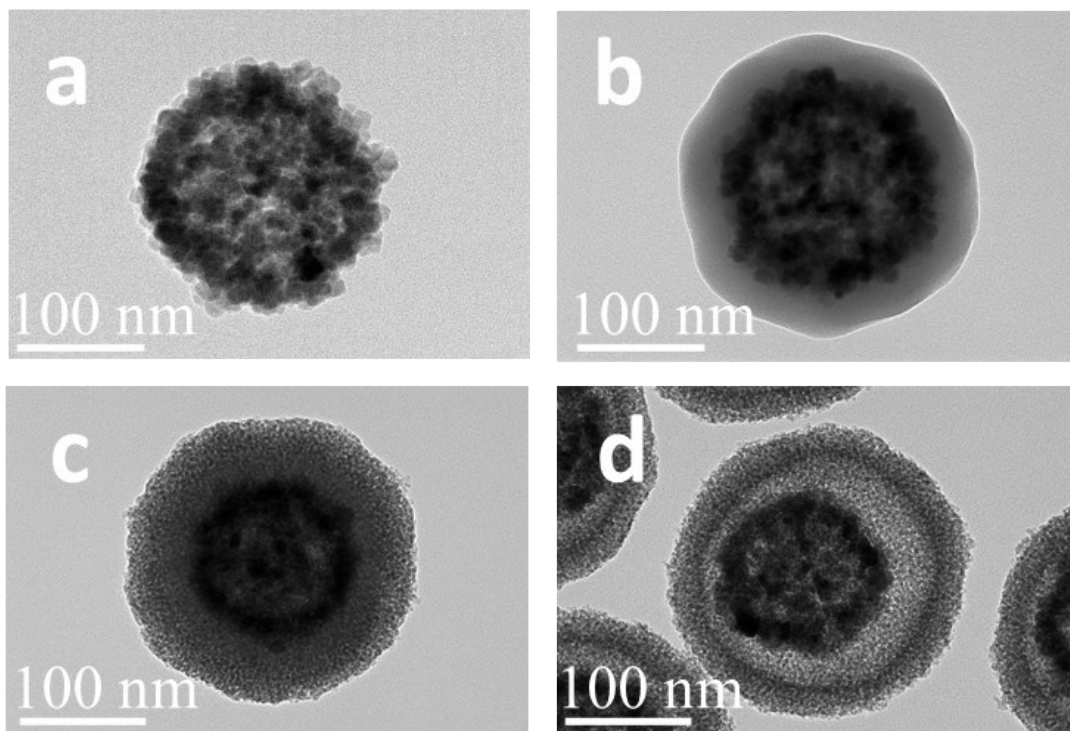

**Figure S11.** TEM images of (a)  $\text{Fe}_3\text{O}_4$ -HNs, (b)  $\text{Fe}_3\text{O}_4@$  $\text{SiO}_2$ -HNs-40-40, (c)  $\text{Fe}_3\text{O}_4@$  $\text{SiO}_2@$  $\text{TiO}_2$ -HNs-40-40-40, and (d) DS- $\text{Fe}_3\text{O}_4@$  $\text{TiO}_2$ -HNs-40-40-40.

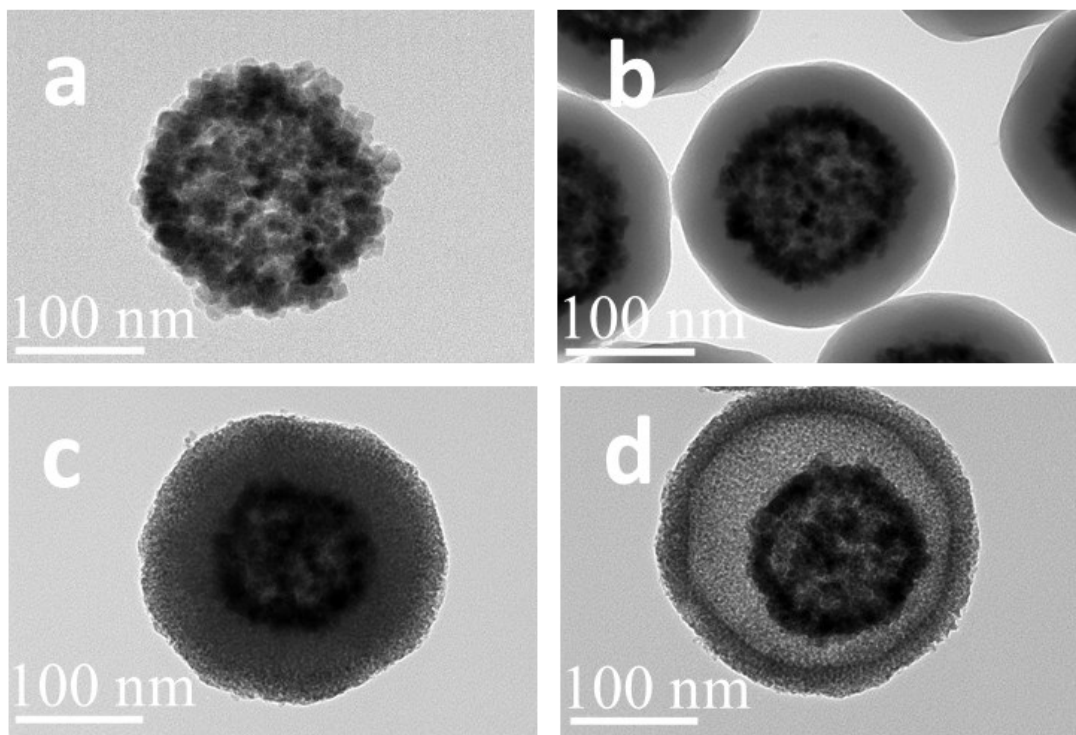

**Figure S12.** TEM images of (a)  $\text{Fe}_3\text{O}_4$ -HNs, (b)  $\text{Fe}_3\text{O}_4@$  $\text{SiO}_2$ -HNs-40-60, (c)  $\text{Fe}_3\text{O}_4@$  $\text{SiO}_2@$  $\text{TiO}_2$ -HNs-40-60-40, and (d) DS- $\text{Fe}_3\text{O}_4@$  $\text{TiO}_2$ -HNs-40-60-40.

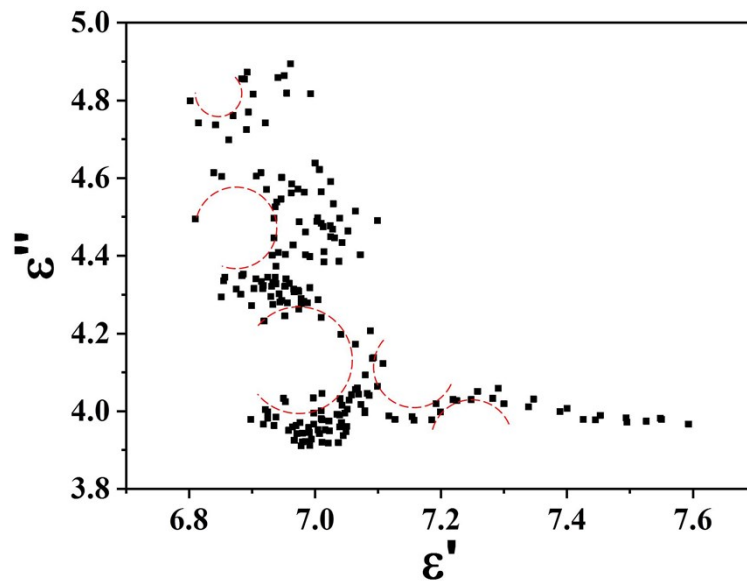

**Figure S13.** Dielectric Cole-Cole semicircles of DS-Fe<sub>3</sub>O<sub>4</sub>@TiO<sub>2</sub>-HNs.

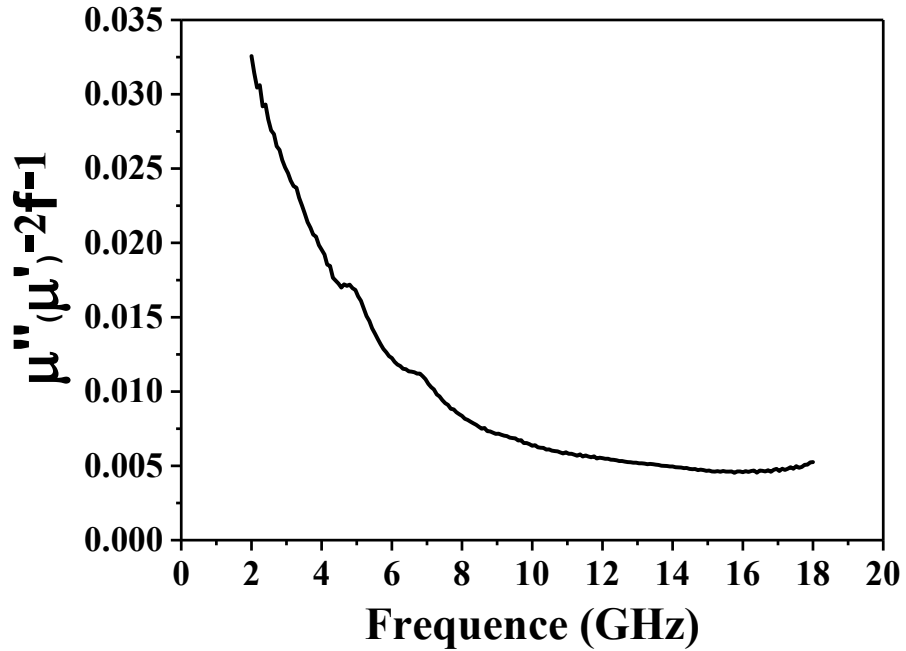

**Figure S14.** Frequency-dependent eddy current loss plot of DS-Fe<sub>3</sub>O<sub>4</sub>@TiO<sub>2</sub>-HNs.

**Table S1.** Summary of microwave absorption properties of the state-of-the-art absorbers

| <b>Types of absorber</b>                                  | <b>Thickness<br/>(mm)</b> | <b>Reflection<br/>loss<br/>minimum,<br/><math>RL_{min}</math> (dB)</b> | <b>Effective<br/>bandwidth<br/>(<math>&lt; -10</math> dB)<br/>(GHz)</b> | <b>Frequency<br/>range<br/>(<math>&lt; -10</math> dB)<br/>(GHz)</b> | <b>Refs.</b>     |
|-----------------------------------------------------------|---------------------------|------------------------------------------------------------------------|-------------------------------------------------------------------------|---------------------------------------------------------------------|------------------|
| RGO/Fe <sub>3</sub> O <sub>4</sub> /Fe                    | 4                         | -23.09                                                                 | 3.9                                                                     | 7.4-11.3                                                            | 2 (2016)         |
| Fe <sub>3</sub> O <sub>4</sub> /C                         | 2                         | -20.60                                                                 | 3.8                                                                     | 11.8-15.6                                                           | 3 (2014)         |
| Fe <sub>3</sub> O <sub>4</sub> /CuSilicate                | 2                         | -23.50                                                                 | 10.4                                                                    | 3.5-13.9                                                            | 4 (2013)         |
| CoNi/SiO <sub>2</sub> /TiO <sub>2</sub>                   | 2.1                       | -58.20                                                                 | 8.1                                                                     | 8-16.1                                                              | 1 (2016)         |
| RGO/Fe <sub>3</sub> O <sub>4</sub>                        | 2                         | -15.38                                                                 | 2.8                                                                     | 10.4-13.2                                                           | 5 (2013)         |
| CoFe <sub>2</sub> O <sub>4</sub> /RGO                     | 2.8                       | -57.70                                                                 | 5.8                                                                     | 8.3-14.1                                                            | 6 (2018)         |
| Carbon/ Fe <sub>3</sub> O <sub>4</sub>                    | 1.6                       | -32.00                                                                 | 2                                                                       | 10.5-12.5                                                           | 7 (2015)         |
| FeCo/C/CoFe <sub>2</sub> O <sub>4</sub>                   | 6                         | -25.80                                                                 | 7.2                                                                     | 10.8-18                                                             | 8 (2016)         |
| <b>DS-Fe<sub>3</sub>O<sub>4</sub>@TiO<sub>2</sub>-HSs</b> | <b>1.8</b>                | <b>-60.17</b>                                                          | <b>10.5</b>                                                             | <b>7.5-18</b>                                                       | <b>This work</b> |

## References

1. Liu Q, Cao Q, Bi H, Liang C, Yuan K, She W, *et al.* CoNi@SiO<sub>2</sub>@TiO<sub>2</sub> and CoNi@Air@TiO<sub>2</sub> Microspheres with Strong Wideband Microwave Absorption. *Adv. Mater.* **2016**, 28, 486-490.
2. Ding Y, Zhang L, Liao Q, Zhang G, Liu S, Zhang Y. Electromagnetic Wave Absorption in Reduced Graphene Oxide Functionalized with Fe<sub>3</sub>O<sub>4</sub>/Fe Nanorings. *Nano Res.* **2016**, 9, 2018-2025.
3. Du Y, Liu W, Qiang R, Wang Y, Han X, Ma J, *et al.* Shell Thickness-Dependent Microwave Absorption of Core-Shell Fe<sub>3</sub>O<sub>4</sub>@C Composites. *ACS Appl. Mater. Interfaces* **2014**, 6, 12997-13006.
4. Fang J, Liu T, Chen Z, Wang Y, Wei W, Yue X, *et al.* A Wormhole-Like Porous Carbon/Magnetic Particles Composite as an Efficient Broadband Electromagnetic Wave Absorber. *Nanoscale* **2016**, 8, 8899-8909.
5. Sun X, He J, Li G, Tang J, Wang T, Guo Y, *et al.* Laminated Magnetic Graphene with Enhanced Electromagnetic Wave Absorption Properties. *J. Mater. Chem. C* **2013**, 1, 765-777.
6. Liu Y, Chen Z, Zhang Y, Feng R, Chen X, Xiong C, *et al.* Broadband and Lightweight Microwave Absorber Constructed by in Situ Growth of Hierarchical CoFe<sub>2</sub>O<sub>4</sub>/Reduced Graphene Oxide Porous Nanocomposites. *ACS Appl. Mater. Interfaces* **2018**, 10, 13860-13868.
7. Wang J, Zhou H, Zhuang J, Liu Q. Magnetic [Gamma]-Fe<sub>2</sub>O<sub>3</sub>, Fe<sub>3</sub>O<sub>4</sub>, and Fe Nanoparticles Confined within Ordered Mesoporous Carbons as Efficient Microwave Absorbers. *Phys. Chem. Chem. Phys.* **2015**, 17, 3802-3812.
8. Feng Y, Li D, Jiang L, Dai Z, Wang Y, An J, *et al.* Interface Transformation for Enhanced Microwave-Absorption Properties of Core Double-Shell Nanocomposites. *J. Alloys Compd.* **2017**, 694, 1224-1231.
